# Supplementary material
Source: Royal Society of Chemistry journal article supplement (doi:10.1039/d6ta01439a)
Supplement: d6ta01439a1.pdf [file d6ta01439a1.pdf]

1

## Supporting Information

2

### 3 **Construction of an In-BDC MOF Artificial Interface Layer on Zinc Metal Anode** 4 **for Ultra-Long Stability Zinc-Ion Capacitors**

5 *Yuxue Deng<sup>a</sup>, Nuo Cheng<sup>a</sup>, Hongfang Ma<sup>a</sup>, Pingfan Zhou<sup>a</sup>, Peng Huang<sup>a</sup>, Zhenming*  
6 *Xu<sup>a</sup>, Laifa Shen<sup>a\*</sup>, Xiaogang Zhang<sup>a\*</sup>, Hao Tong<sup>a\*</sup>*

7 <sup>a</sup> Jiangsu Key Laboratory of Electrochemical Energy-Storage Technologies College of  
8 Materials Science and Technology Nanjing University of Aeronautics and Astronautics  
9 No. 29 Yudao Street, Nanjing 210016, P. R. China

10 E-mail: tongh@nuaa.edu.cn (Hao Tong), lfshen@nuaa.edu.cn (Laifa Shen),  
11 axgzhang@nuaa.edu.cn (Xiaogang Zhang)

12 \*Corresponding author.

13

### 14 **Experimental Section**

#### 15 **Preparation of Electrode Materials**

16 The synthesis of In-BDC MOF was carried out following a procedure adapted  
17 from literature<sup>[28]</sup>. Indium nitrate hydrate (3 g), 1,4-benzenedicarboxylic acid (1.661 g),  
18 N,N-dimethylformamide (100 mL), and sodium acetate aqueous solution (0.5 mL) were  
19 mixed and stirred for 30 min. The resulting solution was then heated to 120 °C and  
20 maintained at this temperature for 2 h. After cooling to room temperature, the white  
21 precipitate was washed three times with anhydrous ethanol and dried overnight under  
22 vacuum at 60 °C.

23 Zinc foil with a thickness of 100 μm was polished with sandpaper, cut into circular  
24 discs with a diameter of 12 mm, and cleaned three times with anhydrous ethanol for  
25 subsequent use. In-BDC MOF powder, acetylene black, and poly(vinylidene fluoride)  
26 (PVDF) were thoroughly mixed in a mass ratio of 8:1:1. N-Methyl-2-pyrrolidone  
27 (NMP) was added as the solvent to form a homogeneous slurry, which was then  
28 uniformly coated onto the zinc foil. The coated electrode was dried in a vacuum oven  
29 at 60 °C for 12 h to obtain the In-BDC@Zn material.

### 30 **Preparation of Cathode Materials**

31 Activated carbon (AC), acetylene black, and PVDF were uniformly mixed in a  
32 mass ratio of 8:1:1. NMP was used as the solvent to form a homogeneous slurry, which  
33 was then coated onto carbon cloth. The coated electrode was dried in a vacuum oven at  
34 60 °C for 12 h to obtain the AC cathode.

### 35 **Materials Characterization**

36 The crystal structures of the obtained samples were determined by X-ray  
37 diffraction (XRD) analysis using a Bruker AXS-D8 powder X-ray diffractometer.  
38 Fourier transform infrared (FTIR) spectra were recorded on a PerkinElmer  
39 spectrometer over the range of 300-4000  $\text{cm}^{-1}$  to investigate the structural features and  
40 identify characteristic functional groups. The morphology and elemental distribution of  
41 the samples were characterized using a Hitachi S-4800 scanning electron microscope  
42 (SEM) equipped with an energy-dispersive X-ray spectrometer (EDS). Raman spectra  
43 were acquired with a LabRAM HR Evolution Raman spectrometer to further confirm  
44 the material composition. Nitrogen adsorption-desorption isotherms were measured at  
45 77 K on a Micromeritics ASAP-2020HD88 surface area and porosity analyzer to  
46 evaluate specific surface area and pore size distribution. X-ray photoelectron  
47 spectroscopy (XPS) was performed on a PHI550 spectrometer with an Al-K $\alpha$  radiation  
48 source (1486.6 eV) to analyze surface elemental composition and chemical states. The  
49 wettability of the electrodes toward the electrolyte was evaluated using a contact angle  
50 goniometer.

51

### 52 **Electrochemical Measurements**

#### 53 **Electrochemical Performance Testing**

54 A three-electrode configuration was assembled in 1 M  $\text{Na}_2\text{SO}_4$  aqueous electrolyte,  
55 using a saturated calomel electrode ( $\text{Hg}/\text{Hg}_2\text{Cl}_2$ ) as the reference electrode, a platinum  
56 foil as the counter electrode, and either In-BDC@Zn or bare Zn as the working  
57 electrode. Corrosion resistance was evaluated by potentiodynamic polarization  
58 measurements conducted over a potential range from -0.8 to -1.4 V at a scan rate of 1

59 mV s<sup>-1</sup>. Linear sweep voltammetry (LSV) tests were performed within a potential  
60 window of -2.0 to -1.0 V at a scan rate of 1 mV s<sup>-1</sup>.

61 Zinc-ion hybrid capacitors were employed for cyclic voltammetry (CV) and  
62 electrochemical impedance spectroscopy (EIS) measurements. CV tests were carried  
63 out in a voltage range of 0.2-1.8 V at scan rates of 5, 10, 20, 50, and 100 mV s<sup>-1</sup>. EIS  
64 measurements were conducted over a frequency range from 0.01 to 10<sup>6</sup> Hz.

65 Zinc-ion symmetric cells were used to determine the Zn<sup>2+</sup> transference number.  
66 The Zn<sup>2+</sup> transference number ( $T_{Zn^{2+}}$ ) was calculated according to Equation (1):

67 
$$T_{Zn^{2+}} = \frac{I_s(\Delta V - I_0 R_0)}{I_0(\Delta V - I_s R_s)} \quad \# (1)$$
 Here,  $\Delta V$  represents the applied polarization voltage,  $I_0$  is the  
68 initial current,  $I_s$  corresponds to the steady-state current,  $R_0$  denotes the interfacial  
69 resistance before polarization, and  $R_s$  is the interfacial resistance after reaching the  
70 steady state.

71 Temperature-dependent electrochemical impedance measurements were carried  
72 out in the temperature range of 40-60 °C with an interval of 5 °C. The Zn<sup>2+</sup> desolvation  
73 energy ( $E_a$ ) of the electrodes was subsequently calculated using the Arrhenius equation:

74 
$$\frac{1}{R_{ct}} = A \exp\left(-\frac{E_a}{RT}\right) \quad \# (2)$$
 Here,  $R_{ct}$  represents the charge-transfer resistance,  $A$  is the  
75 Arrhenius constant,  $R$  is the universal gas constant, and  $T$  denotes the absolute  
76 temperature.

77 The energy density ( $E_s$ ) and power density ( $P_s$ ) of the zinc-ion hybrid capacitor  
78 were calculated from the galvanostatic charge-discharge (GCD) profiles according to  
79 the following equations:

80 
$$C_{cell} = \frac{I\Delta t}{mV} \quad \# (3)$$

81 
$$E_s = \frac{0.5C_{cell}V^2}{3.6} \quad \# (4)$$

82 
$$P_s = \frac{3600E_s}{\Delta t} \quad \# (5)$$

83 Here,  $C_{cell}$  denotes the specific capacitance of the device,  $I$  is the discharge current,  $\Delta t$   
84 represents the discharge time,  $m$  corresponds to the mass loading of the active material  
85 in the cathode, and  $V$  is the effective discharge voltage window.

86

## 87 Density Functional Theory (DFT) Calculations

88 Spin-polarized density functional theory (DFT) calculations<sup>[1,2]</sup> were performed  
89 using a plane-wave basis set within the projector augmented-wave (PAW) method, as  
90 implemented in the Vienna *ab initio* simulation package (VASP)<sup>[3,4]</sup> The exchange–  
91 correlation interactions were treated using the Perdew-Burke-Ernzerhof (PBE)  
92 functional within the generalized gradient approximation (GGA) framework<sup>[5]</sup>. To  
93 eliminate interactions between periodic images, a vacuum layer of approximately 15 Å  
94 was introduced along the surface normal direction. The plane-wave energy cutoff was  
95 set to 450 eV. Brillouin zone integrations were carried out using a  $\Gamma$ -centered  $1 \times 1 \times 1$   
96 Monkhorst-Pack  $k$ -point mesh. All structures were fully relaxed until the total energy  
97 convergence criterion reached  $1 \times 10^{-5}$  eV, and the maximum residual force on each  
98 atom was less than 0.03 eV Å<sup>-1</sup>. The adsorption energy ( $E_{ads}$ ) was defined as:  
99  $E_{ads} = E_{*M} - E_* - E_M$ , where  $E_{*M}$  is the total energy of the substrate with the adsorbed  
100 species  $M$ ,  $E_*$  is the energy of the clean substrate, and  $E_M$  represents the energy of an  
101 isolated  $M$  species in vacuum. Visualization of crystal structures and charge density  
102 distributions was performed using the VESTA software.

103

104

105

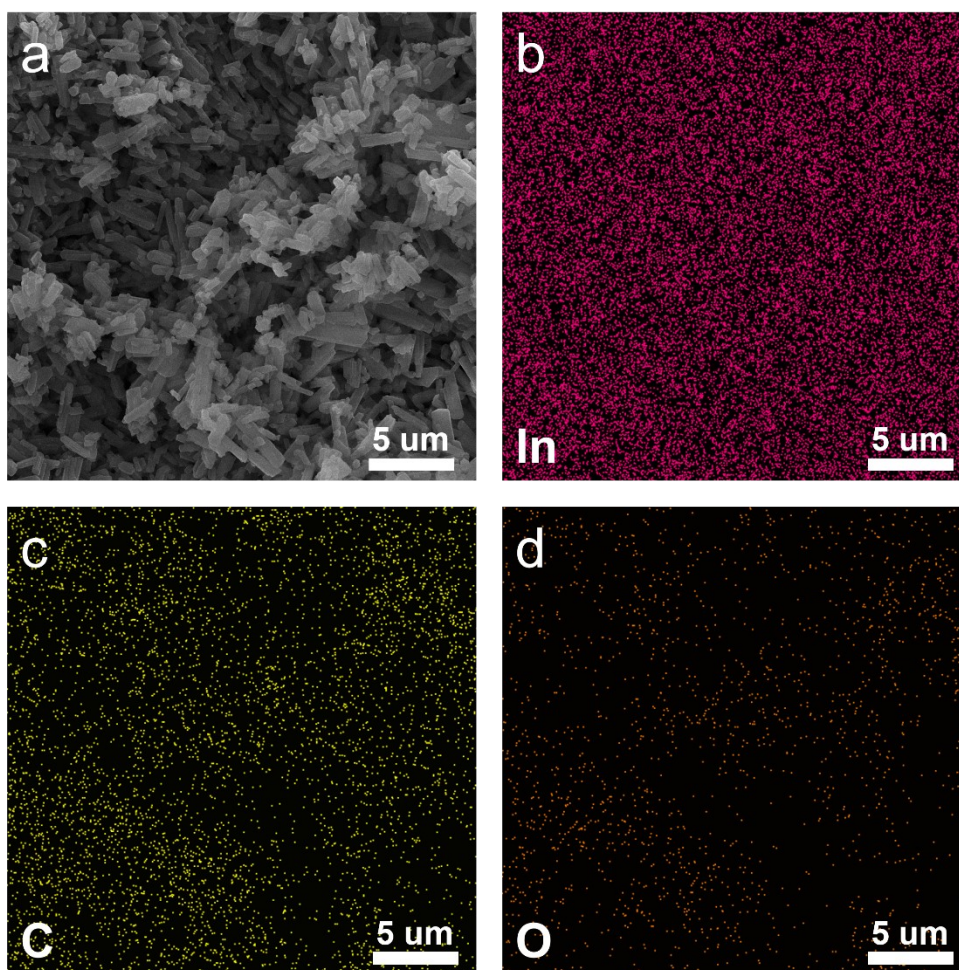

106  
107

Figure S1. (a-d) EDS mapping diagram of In-MOF powder

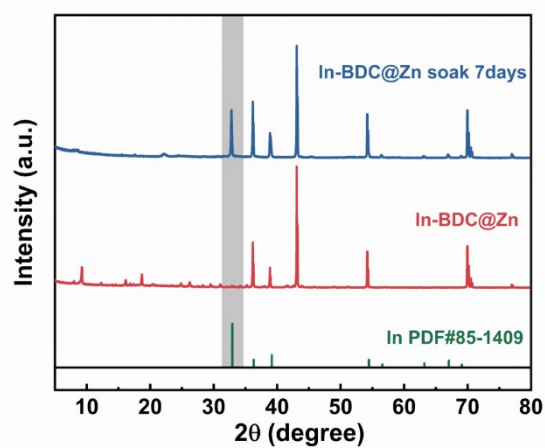

108

109 Figure S2. Comparison of XRD patterns of In-BDC@Zn before and after 7 days of  
110 immersion

111

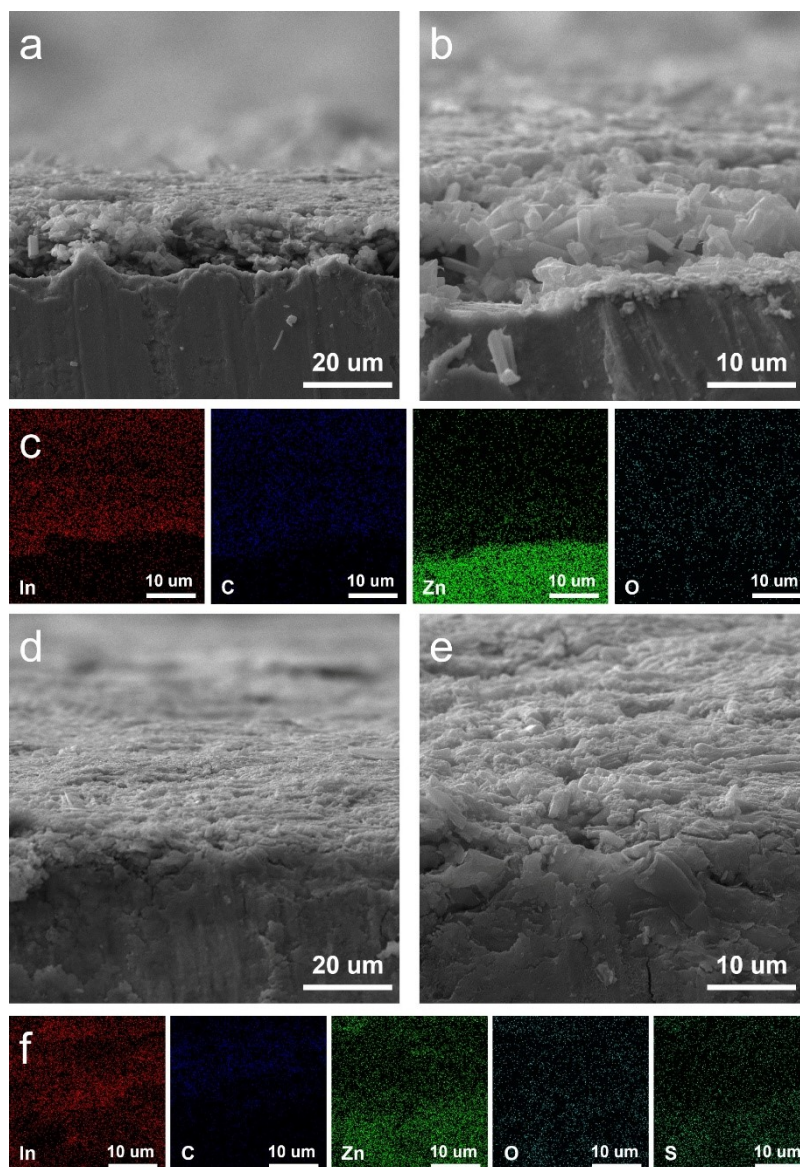

112

113 Figure S3. (a-b) Cross-sectional SEM images of In-BDC@Zn; (c) Cross-sectional  
 114 EDS-mapping image of In-BDC@Zn; (d-e) Cross-sectional SEM images of In-  
 115 BDC@Zn after 7 days of immersion; (f) Cross-sectional EDS-mapping image of In-  
 116 BDC@Zn after 7 days of immersion

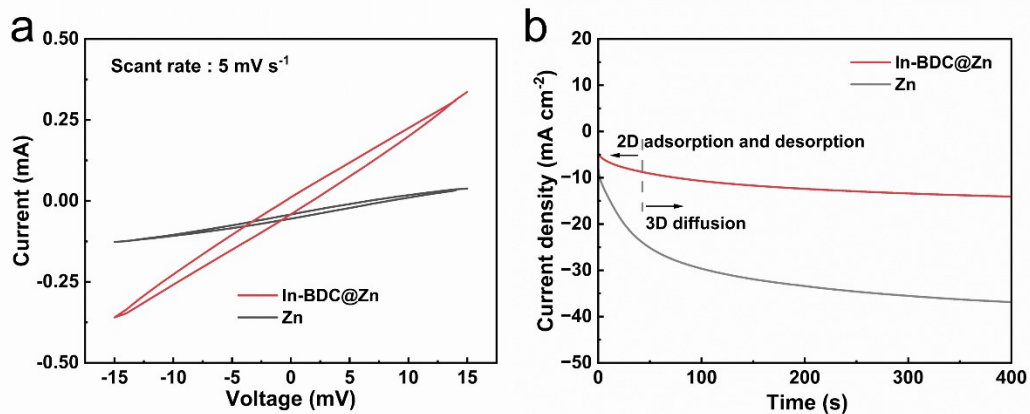

117

118 Figure S4. (a) Comparison of CV curves for In-BDC@Zn//In-BDC@Zn and Zn//Zn  
 119 symmetric cells at a scan rate of  $5 \text{ mV s}^{-1}$ ; (b) Chronoamperometry curve under constant  
 120 voltage polarization at  $-150 \text{ mV}$

121

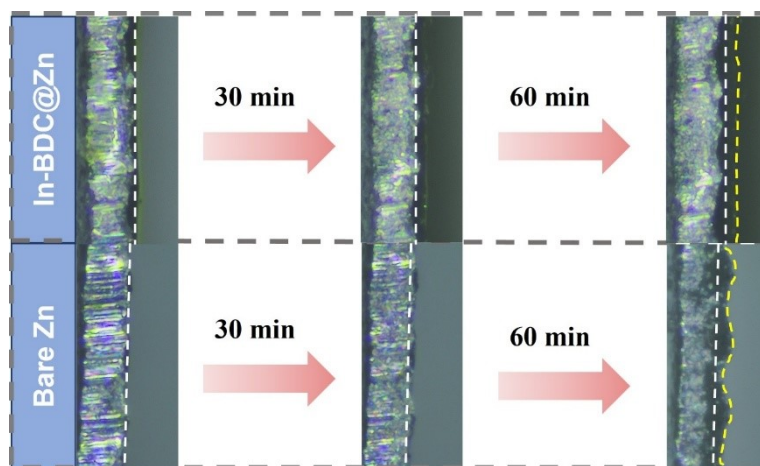

122

123 Figure S5. In situ optical microscopy images of the electroplating process for In-  
 124 BDC@Zn and bare Zn electrodes at a current density of  $10 \text{ mA cm}^{-2}$

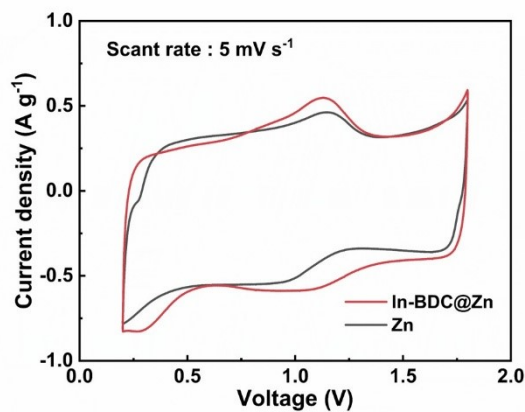

125

126

127

Figure S6. CV curves of In-BDC@Zn and bare Zn at  $5 \text{ mV s}^{-1}$

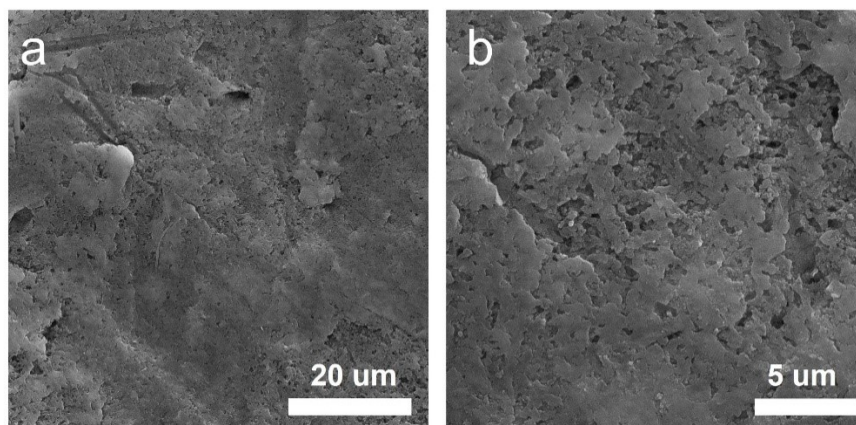

128

129 Figure S7. SEM images of the In-BDC@Zn electrode after cycling at  $20 \text{ mA cm}^{-2}$  and  
130  $0.5 \text{ mAh cm}^{-2}$  for 1000 h

131

### 132 **References**

133 [1] P. Hohenberg, W. Kohn, Inhomogeneous electron gas, *Phys. Rev.* 136 (1964)

134 B864.

135 [2] W. Kohn, L. J. Sham, Self-consistent equations including exchange and  
136 correlation effects, *Phys. Rev.* 140 (1965) A1133

137 [3] G. Kresse, J. Furthmüller, Efficient iterative schemes for ab initio total-energy  
138 calculations using a plane-wave basis set, *Phys. Rev. B* 54 (1996) 11169.

139 [4] P. E. Blöchl, Projector augmented-wave method, *Phys. Rev. B* 50 (1994) 17953.

140 [5] J. P. Perdew, K. Burke, M. Ernzerhof. Generalized gradient approximation made  
141 simple, *Phys. Rev. Lett.* 77 (1996) 3865.
